# Supplementary material
Source: publisher figshare collection journal article supplement (https://gsajournals.figshare.com/ndownloader/files/13248587)
Supplement: Supplementary file 1 [file 13248587]

Variable	Type	Units	Description
TRAY	Factor. 6 levels	NA	Vials holding experimental animals were split across six trays for handling. Included here as a potential co-variate
TREATMENT	Factor. 4 levels	NA	Metal exposure treatment during MA. Control = metal-free MA lines. Competitive = individuals from a tank where selection could occur (i.e. the non-MA population)
LINE	Factor. 40 levels	NA	MA line identifier
GENERATION	Integer. Can be NA	Generations	Generations under MA for that line when individuals were sampled for life-history analysis. �Competitive� individuals come from a population without distinct generations (NA)
REPLICATE	Factor. 8 levels	NA	Replicate sub-line within LINE. Usually R1-R7 but in one case R2-R8 (R1 died within 12 hours and was replaced)
LINE_REPLICATE	Factor. 280 levels	NA	Concatenation of LINE and REPLICATE. Included to allow reference to specific replicates
START	Factor. 2 levels	NA	Was that LINE_REPLICATE established? In some cases founding mothers provided insufficient offspring to establish all desired REPLICATEs
ST_START	Factor. 2 levels + NA	NA	Did that LINE_REPLICATE survive the two generations of common-garden prior to the LH assay? (1=Yes, 0=No,NA if "No" to START)
ST_FINISH	Factor. 2 levels + NA	NA	Did the individual measured for life-history traits survive until it produced at least four clutches? NA if ST_START is "No"
DOB	Integer. Can be NA	Days	Date of birth of individuals measured for life-history traits and for body size at maturity in days since the start of the experiment. Included here as a potential co-variate
C1_AGE	Integer. Can be NA	Days	Age of individual measured for life-history at release of first clutch
C1_COUNT	Integer. Can be NA	Individuals	Number of offspring released in first clutch. NA in an otherwise complete line indicates that count was accidently lost / not undertaken
C2_AGE	Integer. Can be NA	Days	Age of individual measured for life-history at release of second clutch
C2_COUNT	Integer. Can be NA	Individuals	Number of offspring released in second clutch. NA in an otherwise complete line indicates that count was accidently lost / not undertaken
C3_AGE	Integer. Can be NA	Days	Age of individual measured for life-history at release of third clutch
C3_COUNT	Integer. Can be NA	Individuals	Number of offspring released in third clutch. NA in an otherwise complete line indicates that count was accidently lost / not undertaken
C4_AGE	Integer. Can be NA	Days	Age of individual measured for life-history at release of forth clutch
C4_COUNT	Integer. Can be NA	Individuals	Number of offspring released in forth clutch. NA in an otherwise complete line indicates that count was accidently lost / not undertaken
LONGEVITY	Integer. Can be NA	Days	Age of individual measured for life-history at time of death in days
LONGEVITY_EXCLUDE	Factor. 2 levels + NA	NA	Should this LINE_REPLICATE be excluded from analyses of longevity because either the life-history assay never started or the LINE_REPLICATE was accidently killed?
SIZE_AGE	Integer. Can be NA	Days	Age of individual measured for size at maturity at the time of release of first clutch
SIZE_SAME	Factor. 2 levels + NA	NA	Upon release of the first clutch was the individual measure for size at maturity preserved in ethanol the same day (Yes) or the next day (No)?
SIZE	Numeric. Can be NA	Millimetres	Size of individual measured for size. All values were determined to three decimal places (i.e. - "2.69" implies "2.690")
SIZE_EXCLUDE	Factor. 2 levels + NA	NA	Should this LINE_REPLICATE be excluded from analyses of size because the life-history assay never started or the LINE_REPLICATE was accidently killed?
